# Supplementary material for: Highly alkynyl-functionalization of cellulose nanocrystals and advanced nanocomposites thereof via click chemistry
Source: Royal Society of Chemistry journal article supplement (doi:10.1039/c5py00367a), 2015-01-01
Supplement: c5py00367a1.pdf [file c5py00367a1.pdf]

## Supporting Information

### Highly alkynyl-functionization of cellulose nanocrystals and advanced nanocomposites thereof via click chemistry

Jun Chen <sup>a,1</sup>, Ning Lin <sup>a,b,c,1</sup>, Jin Huang <sup>a,\*</sup>, Alain Dufresne <sup>b,c</sup>

<sup>a</sup> School of Chemistry, Chemical Engineering and Life Sciences, Wuhan University  
of Technology, Wuhan 430070, China

<sup>b</sup> Univ. Grenoble Alpes, LGP2, F-38000, Grenoble, France

<sup>c</sup> CNRS, LGP2, F-38000 Grenoble, France

---

<sup>1</sup> J. Chen and N. Lin are the first co-authors, who contributed equally to this work.

\* Corresponding author: School of Chemistry, Chemical Engineering and Life Sciences, Wuhan University of Technology, 122 Luoshi Road, Wuhan 430070, China.

E-mail address: [huangjin@iccas.ac.cn](mailto:huangjin@iccas.ac.cn) (J. Huang)

Tel: +86 27 87749300; fax: +86 27 87749300.

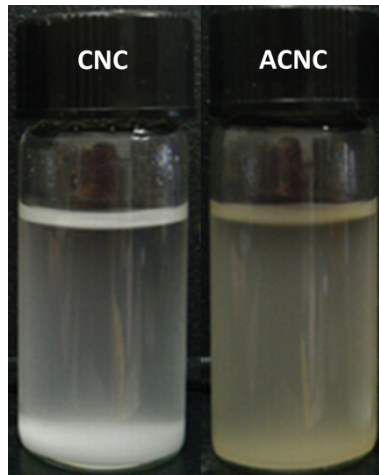

**Figure S1.** The dispersion state of CNC and ACNC in tetrahydrofuran (THF).

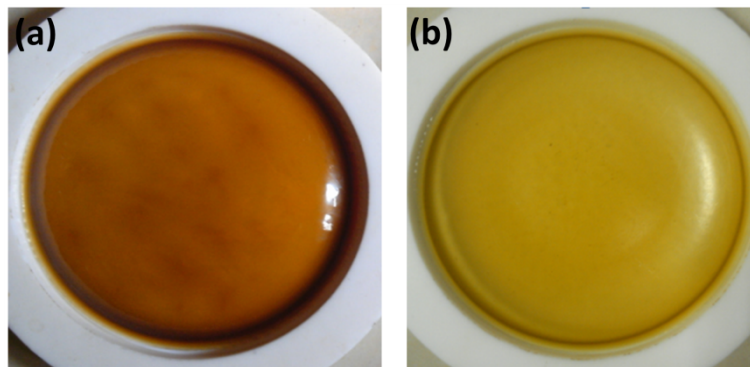

**Figure S2.** The molding pictures of (a) the neat GP2 composite, (b) the GP2/ACNC-1.0 nanocomposites.

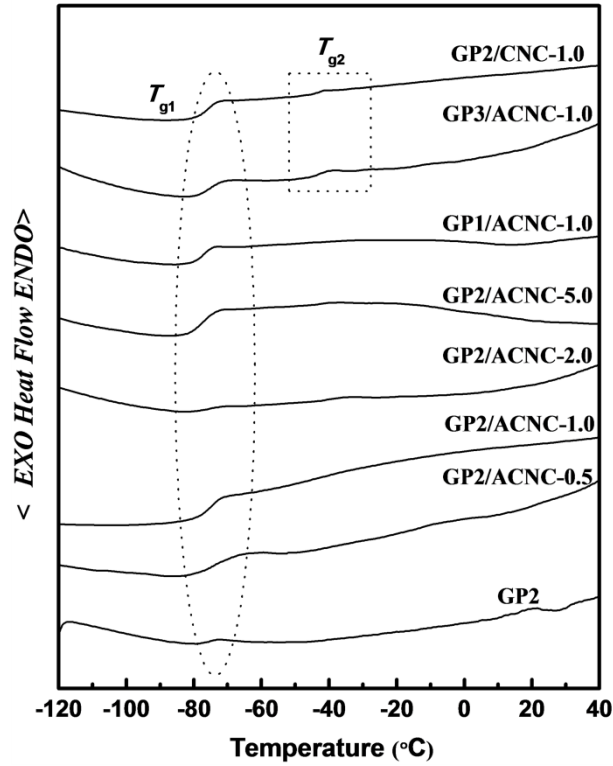

**Figure S3.** DSC thermograms for the GP2/ACNC nanocomposites with the addition of various ACNC contents, GP1/ACNC-1.0, GP3/ACNC-1.0 nanocomposites as well as GP2/CNC-1.0 nanocomposite.
